# Supplementary material for: Birth Weight and Early Postnatal Outcomes: Association with the Cord Blood Lipidome
Source: Nutrients. 2022 Sep 12;14(18):3760. doi: 10.3390/nu14183760 (PMC9505183; doi:10.3390/nu14183760)

**Figure S1.** (A, B) PCA, (C, D) PLS-DA, and (E-J) OPLS-DA score plots (green circles, SGA samples (n = 12); purple squares, AGA samples (control group, n = 12); blue triangle, LGA samples (n = 12); orange diamonds, QC samples (n = 8)) of LC-MS positive and negative ion modes. **C** ( $R^2 = 0.921$ ;  $Q^2 = 0.784$ , p CV-ANOVA =  $2.01 \times 10^{-12}$ ), and **D** ( $R^2 = 0.989$ ;  $Q^2 = 0.972$ , p CV-ANOVA =  $1.36 \times 10^{-28}$ ) represent the PLS-DA models built for LC-MS ESI (+), and LC-MS ESI (–), respectively.

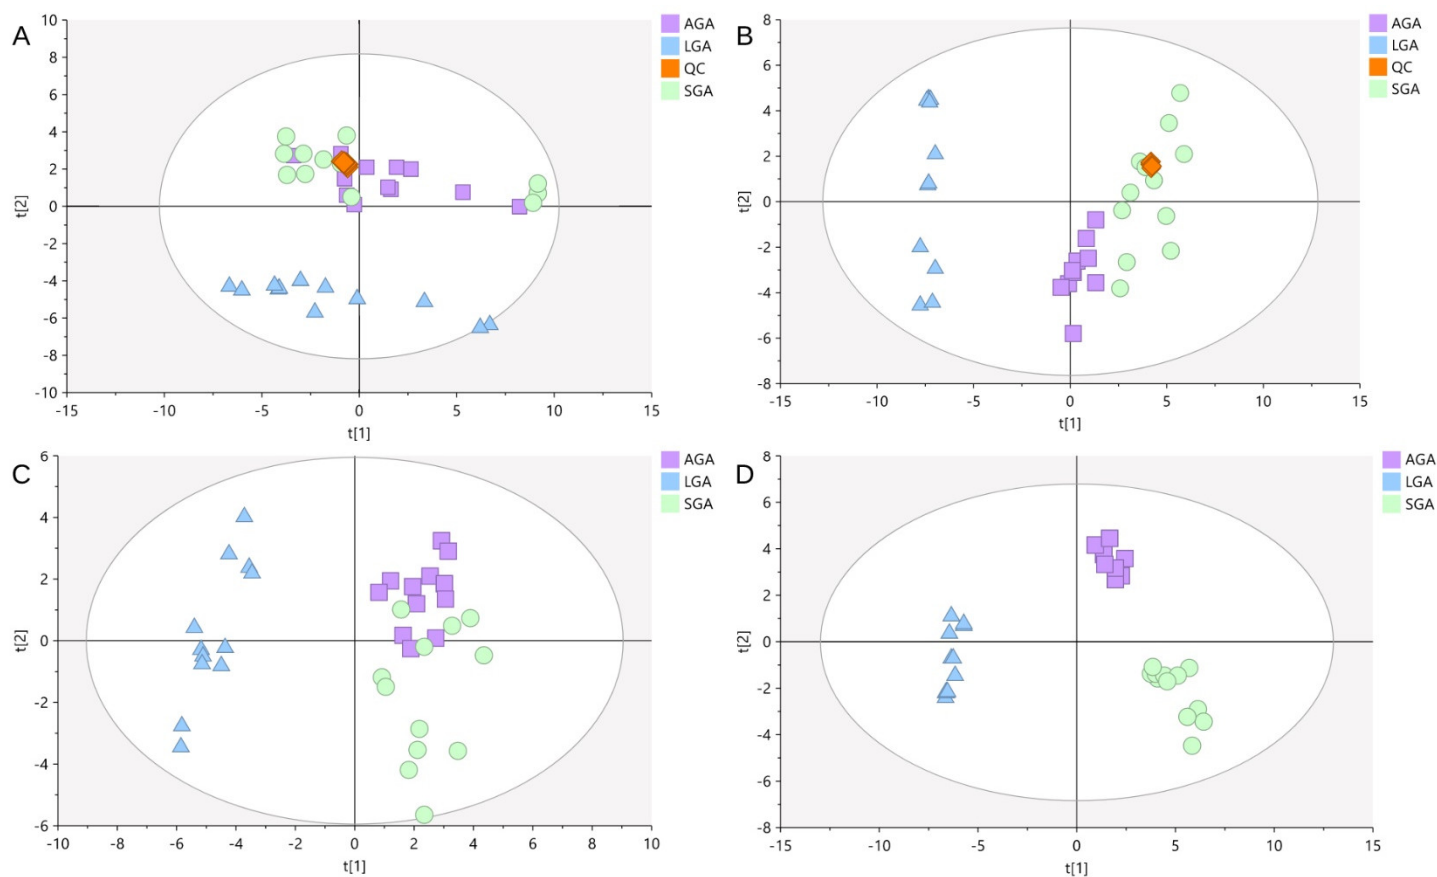

Supplement: Supplementary file 1 [file nutrients-14-03760-s001.zip › Supplementary Figure S1.pdf]
