# Supplementary material for: Birth Weight and Early Postnatal Outcomes: Association with the Cord Blood Lipidome
Source: Nutrients. 2022 Sep 12;14(18):3760. doi: 10.3390/nu14183760 (PMC9505183; doi:10.3390/nu14183760)

**Figure S2.** **A** SGA vs AGA ( $R^2 = 0.989$ ;  $Q^2 = 0.619$ , 92% correctly classified samples, and  $p$  CV-ANOVA = 0.041), **B** LGA vs AGA ( $R^2 = 0.996$ ;  $Q^2 = 0.988$ , 100% correctly classified samples, and  $p$  CV-ANOVA =  $2.57 \times 10^{-15}$ ), **C** LGA vs SGA ( $R^2 = 0.990$ ;  $Q^2 = 0.976$ , 100% correctly classified samples, and  $p$  CV-ANOVA =  $9.20 \times 10^{-13}$ ) represent the OPLS-DA models built for LC-MS ESI (+). **D** SGA vs AGA ( $R^2 = 0.998$ ;  $Q^2 = 0.951$ , 100% correctly classified samples, and  $p$  CV-ANOVA =  $2.75 \times 10^{-7}$ ), **E** LGA vs AGA ( $R^2 = 0.997$ ;  $Q^2 = 0.987$ , 100% correctly classified samples, and  $p$  CV-ANOVA =  $6.72 \times 10^{-16}$ ), **F** LGA vs SGA ( $R^2 = 0.997$ ;  $Q^2 = 0.989$ , 100% correctly classified samples, and  $p$  CV-ANOVA =  $1.82 \times 10^{-18}$ ) represent the OPLS-DA models built for LC-MS ESI (-).

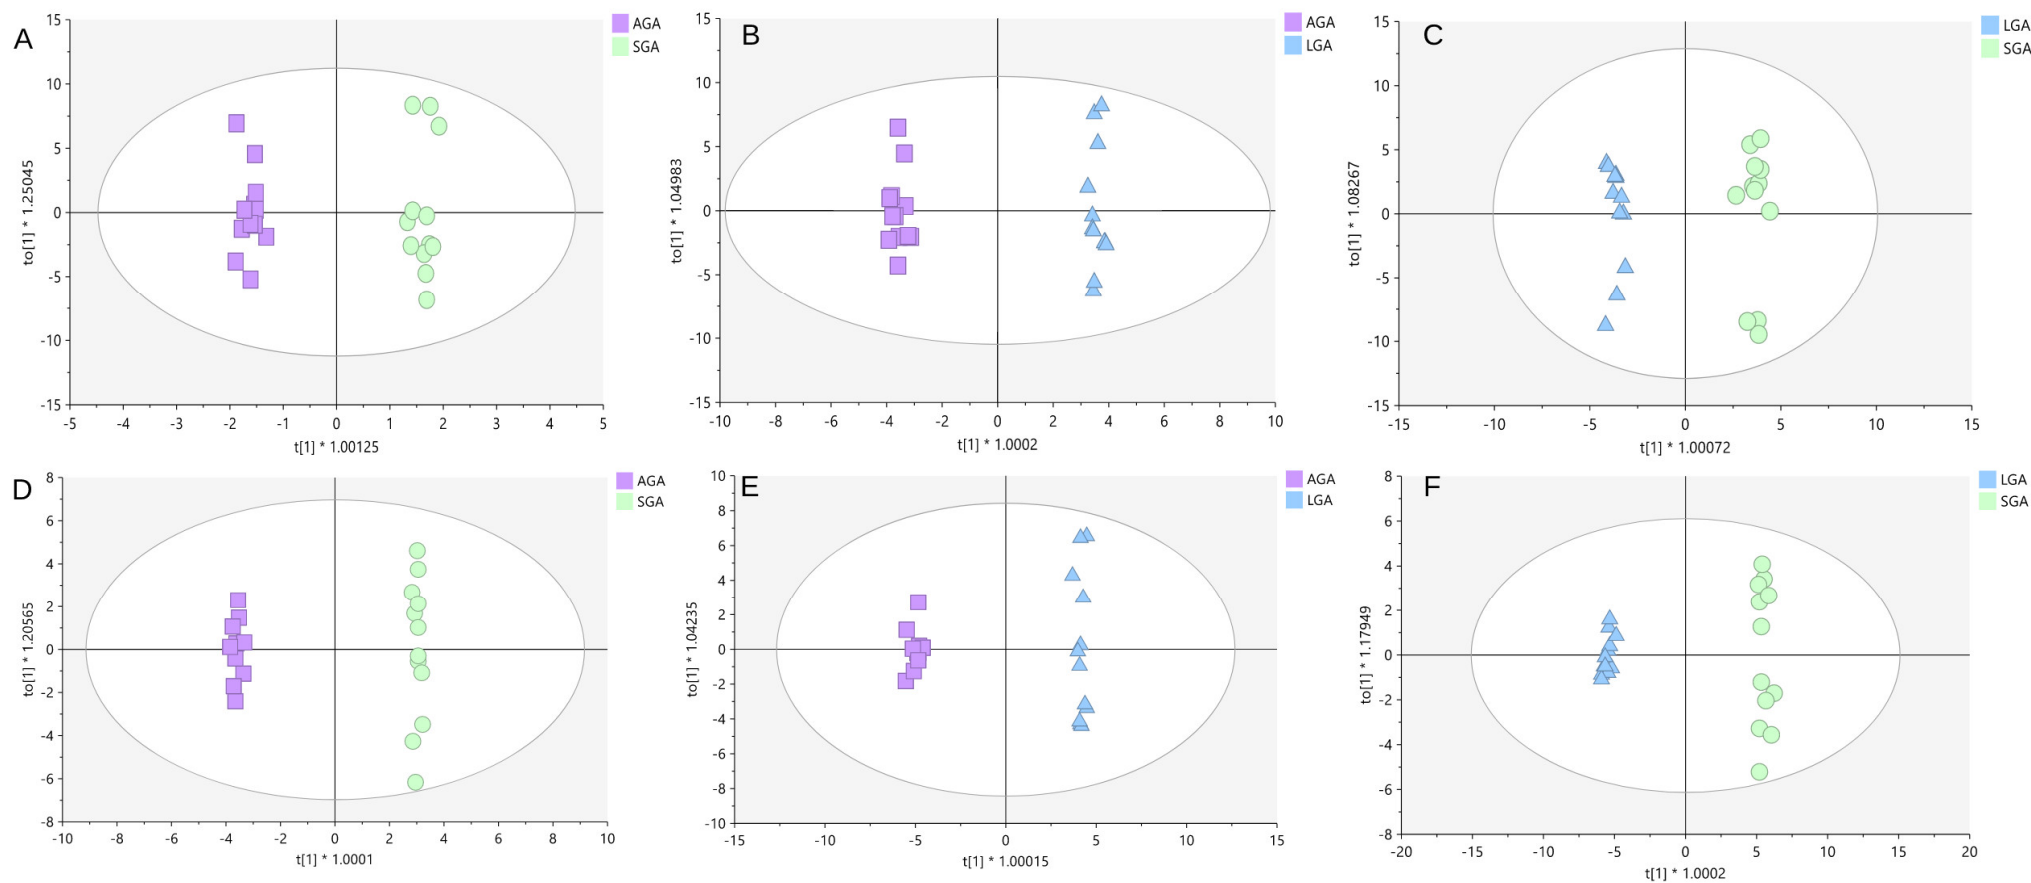

Supplement: Supplementary file 1 [file nutrients-14-03760-s001.zip › Supplementary Figure S2.pdf]
