# Supplementary material for: Birth Weight and Early Postnatal Outcomes: Association with the Cord Blood Lipidome
Source: Nutrients. 2022 Sep 12;14(18):3760. doi: 10.3390/nu14183760 (PMC9505183; doi:10.3390/nu14183760)
Supplement: Supplementary file 1 [file nutrients-14-03760-s001.zip › Supplementary Table S1.pdf]

**Table S1.** Internal standards (IS) of the LightSPLASH® Lipidomix® Mass Spec Standard (in MeOH), and the additional IS (in MeOH) standards added to each sample.

| Mixture Component             | Monoisotopic mass | RT (min) | Adduct ESI(+) / ESI (-)                                                     | Final concentration in sample (µg/mL) | CV (%) ESI(+) / ESI(-) |
|-------------------------------|-------------------|----------|-----------------------------------------------------------------------------|---------------------------------------|------------------------|
| PC(15:0/18:1)                 | 745.5621          | 7.91     | [M+H] <sup>+</sup> / [M+CH <sub>3</sub> COOH-H] <sup>-</sup>                | 0.125                                 | 2.7 / 5.1              |
| LPC(18:1)                     | 521.3481          | 2.65     | [M+H] <sup>+</sup> / [M+CH <sub>3</sub> COOH-H] <sup>-</sup>                | 0.125                                 | 2.3 / 2.7              |
| PE(15:0/18:1)                 | 703.5152          | 8.30     | [M+H] <sup>+</sup> / [M-H] <sup>-</sup>                                     | 0.125                                 | 2.8 / 3.7              |
| LPE(18:1)                     | 479.3011          | 2.76     | [M+H] <sup>+</sup> / [M-H] <sup>-</sup>                                     | 0.125                                 | 3.2 / 7.4              |
| PG(15:0/18:1)                 | 734.5097          | 6.41     | [M+NH <sub>4</sub> ] <sup>+</sup> / [M-H] <sup>-</sup>                      | 0.125                                 | 4.0 / 3.4              |
| PI(15:0/18:1)                 | 822.5258          | 6.18     | [M+NH <sub>4</sub> ] <sup>+</sup> / [M-H] <sup>-</sup>                      | 0.125                                 | 6.1 / 3.2              |
| PS(15:0/18:1)                 | 747.5050          | 6.34     | [M+H] <sup>+</sup> / [M-H] <sup>-</sup>                                     | 0.125                                 | 5.3 / 5.3              |
| TG(15:0/18:1/15:0)            | 804.7206          | 13.90    | [M+NH <sub>4</sub> ] <sup>+</sup> / N.D.                                    | 0.125                                 | 6.7 / ND               |
| DG(15:0/18:1)                 | 580.5066          | 11.61    | [M+NH <sub>4</sub> ] <sup>+</sup> / [M+CH <sub>3</sub> COOH-H] <sup>-</sup> | 0.125                                 | 10.2 / 3.7             |
| MG(18:1)                      | 356.2926          | 3.60     | [M+Na] <sup>+</sup> / N.D.                                                  | 0.125                                 | 3.1 / ND               |
| CE(18:1)                      | 650.6002          | 15.31    | [M+NH <sub>4</sub> ] <sup>+</sup> / N.D.                                    | 0.125                                 | 6.2 / ND               |
| SM(d18:1/18:1)                | 728.5832          | 7.16     | [M+H] <sup>+</sup> / [M+CH <sub>3</sub> COOH-H] <sup>-</sup>                | 0.125                                 | 5.8 / 6.4              |
| Cer(d18:1/15:0)               | 523.4964          | 7.70     | [M+H] <sup>+</sup> / [M+CH <sub>3</sub> COOH-H] <sup>-</sup>                | 0.125                                 | 4.9 / 2.2              |
| Sphinganine (d17:0)           | 287.2824          | 1.79     | [M+H] <sup>+</sup> / [M+CH <sub>3</sub> COOH-H] <sup>-</sup>                | 1.000                                 | 5.9 / 6.0              |
| Palmitic acid-d <sub>31</sub> | 287.4348          | 3.12     | N.D. / [M-H] <sup>-</sup>                                                   | 3.750                                 | - / 1.7                |

RT, retention time; ESI, electrospray ionization; CV, coefficient of variation.
