# Supplementary material for: Birth Weight and Early Postnatal Outcomes: Association with the Cord Blood Lipidome
Source: Nutrients. 2022 Sep 12;14(18):3760. doi: 10.3390/nu14183760 (PMC9505183; doi:10.3390/nu14183760)
Supplement: Supplementary file 1 [file nutrients-14-03760-s001.zip › Supplementary Table S2.pdf]

**Supplementary Table S2.** Data from infants born small- (SGA), appropriate (AGA) or large-for-gestational-age (LGA) and from their mothers

|                                                           | SGA (n=12)<br>50% girls | AGA (n=12)<br>58% girls | LGA (n=12)<br>50% girls | <i>P value</i> |
|-----------------------------------------------------------|-------------------------|-------------------------|-------------------------|----------------|
| <b>Maternal data</b>                                      |                         |                         |                         |                |
| Age at conception (yr)                                    | 32.2 ± 1.4              | 30.4 ± 1.3              | 33.6 ± 1.1              | 0.2405         |
| Pre-gestational BMI (kg/m <sup>2</sup> )                  | 23.3 ± 0.7              | 22.8 ± 0.8              | 30.5 ± 1.8              | <0.0001        |
| BMI at the end of pregnancy                               | 28.3 ± 0.7              | 27.8 ± 1.0              | 35.8 ± 1.4              | <0.0001        |
| Gestational age (wk)                                      | 38.6 ± 0.4              | 39.6 ± 0.4              | 40.2 ± 0.3              | 0.0053         |
| <b>Infants' data</b>                                      |                         |                         |                         |                |
| <b>At birth</b>                                           |                         |                         |                         |                |
| <i>Anthropometric &amp; Endocrine-metabolic variables</i> |                         |                         |                         |                |
| Weight (kg)                                               | 2.3 ± 0.1               | 3.3 ± 0.1               | 4.4 ± 0.1               | <0.0001        |
| Length (cm)                                               | 45.7 ± 0.5              | 49.9 ± 0.3              | 53.0 ± 0.4              | <0.0001        |
| BMI Z-score                                               | -2.2 ± 0.2              | 0.0 ± 0.2               | 1.6 ± 0.2               | <0.0001        |
| HOMA-IR                                                   | 0.9 ± 0.3               | 1.8 ± 0.6               | 0.9 ± 0.4               | 0.3074         |
| IGF-I (ng/ml)                                             | 51 ± 6                  | 78 ± 8                  | 48 ± 8                  | 0.0110         |
| HMW-adip (mg/ml)                                          | 31.2 ± 6.1              | 31.9 ± 3.2              | 31.1 ± 3.8              | 0.9881         |
| <i>Body composition variables*</i>                        |                         |                         |                         |                |
| Fat mass (gr)                                             | 417 ± 56                | 627 ± 92                | 1267 ± 111              | <0.0001        |
| Abdominal fat (gr)                                        | 22 ± 4                  | 35 ± 7                  | 73 ± 8                  | <0.0001        |
| Lean mass (gr)                                            | 2485 ± 122              | 3019 ± 80               | 3542 ± 86               | <0.0001        |
| <b>At 4 months</b>                                        |                         |                         |                         |                |
| <i>Anthropometric &amp; Endocrine-metabolic variables</i> |                         |                         |                         |                |
| Weight (kg)                                               | 5.8 ± 0.3               | 6.9 ± 0.2               | 7.9 ± 0.2               | <0.0001        |
| Length (cm)                                               | 60.2 ± 0.9              | 62.2 ± 0.8              | 65.9 ± 0.5              | 0.0001         |
| BMI Z-score                                               | -0.7 ± 0.3              | 0.6 ± 0.3               | 0.8 ± 0.2               | 0.0006         |
| HOMA-IR                                                   | 2.6 ± 0.7               | 1.4 ± 0.2               | 0.4 ± 0.1               | 0.0040         |
| IGF-I (ng/ml)                                             | 78 ± 8                  | 57 ± 8                  | 30 ± 3                  | 0.0002         |
| HMW-adip (mg/ml)                                          | 32.7 ± 5.7              | 23.8 ± 2.1              | 37.7 ± 5.2              | 0.0866         |
| <i>Body composition variables</i>                         |                         |                         |                         |                |
| Fat mass (gr)                                             | 2054 ± 147              | 2767 ± 201              | 3085 ± 210              | 0.0028         |
| Abdominal fat (gr)                                        | 129 ± 11                | 169 ± 16                | 195 ± 19                | 0.0252         |
| Lean mass (gr)                                            | 4125 ± 219              | 4407 ± 190              | 5068 ± 194              | 0.0095         |

| <b>At 12 months</b>                                       |            |            |            |         |
|-----------------------------------------------------------|------------|------------|------------|---------|
| <i>Anthropometric &amp; Endocrine-metabolic variables</i> |            |            |            |         |
| Weight, kg                                                | 9.0 ± 0.3  | 10.6 ± 0.4 | 11.2 ± 0.3 | 0.0004  |
| Length, cm                                                | 73.3 ± 0.8 | 76.8 ± 1.1 | 77.8 ± 0.9 | 0.0047  |
| BMI Z-score                                               | 0.8 ± 0.4  | 1.0 ± 0.3  | 1.2 ± 0.2  | 0.0429  |
| HOMA-IR                                                   | 0.8 ± 0.2  | 1.5 ± 0.4  | 0.3 ± 0.2  | 0.0512  |
| IGF-I (ng/ml)                                             | 94 ± 16    | 89 ± 12    | 37 ± 5     | 0.0055  |
| HMW-adip (mg/ml)                                          | 22.6 ± 2.0 | 17.3 ± 2.0 | 15.6 ± 8.6 | 0.1722  |
| <i>Body composition variables</i>                         |            |            |            |         |
| Fat mass (gr)                                             | 3393 ± 158 | 4200 ± 271 | 3791 ± 271 | 0.0649  |
| Abdominal fat (gr)                                        | 165 ± 12   | 250 ± 29   | 229 ± 21   | 0.0242  |
| Lean mass (gr)                                            | 5744 ± 219 | 6810 ± 270 | 7716 ± 226 | <0.0001 |

BMI, body mass index; HOMA-IR, homeostasis model assessment insulin resistance; IGF-I, insulin-like growth factor I; HMW-adip, high-molecular-weight adiponectin.

Values are mean ± standard error. P-values by linear-trend ANOVA.

\*At age 15 days
