# Supplementary material for: Birth Weight and Early Postnatal Outcomes: Association with the Cord Blood Lipidome
Source: Nutrients. 2022 Sep 12;14(18):3760. doi: 10.3390/nu14183760 (PMC9505183; doi:10.3390/nu14183760)
Supplement: Supplementary file 1 [file nutrients-14-03760-s001.zip › Supplementary Table S3.pdf]

**Table S3.** Cord plasma lipids in newborns born small- (SGA, n=12), appropriate (AGA, n=12) or large-for-gestational-age (LGA, n=12). Those lipids showing statistically significant differences for any of the tested comparisons among study subgroups are shown.

| Name                                                     | m/z     | RT (min) | Formula   | CV<br>QC | p<br>kruskal | p kruskal<br>BH | LGA vs AGA |         |       |      | SGA vs AGA |         |        |      | LGA vs SGA |         |        |      | Semi-quantification in ppm |                      |                      |
|----------------------------------------------------------|---------|----------|-----------|----------|--------------|-----------------|------------|---------|-------|------|------------|---------|--------|------|------------|---------|--------|------|----------------------------|----------------------|----------------------|
|                                                          |         |          |           |          |              |                 | FC         | p value | pBH   | VIP  | FC         | p value | pBH    | VIP  | FC         | p value | pBH    | VIP  | ppm SGA<br>(0.12ppm)       | ppm LGA<br>(0.12ppm) | ppm AGA<br>(0.12ppm) |
| Fatty Acyls                                              |         |          |           |          |              |                 |            |         |       |      |            |         |        |      |            |         |        |      |                            |                      |                      |
| Eicosanoids                                              |         |          |           |          |              |                 |            |         |       |      |            |         |        |      |            |         |        |      |                            |                      |                      |
| FA 20:4;O3 (Lipoxin B4)                                  | 351.218 | 0.95     | C20H32O5  | 4.0      | 0.075        | 0.26            | 3.11       | 0.021   | 0.083 | 1.33 | 1.70       | 0.096   | 0.19   | 1.14 | 1.83       | 0.28    | 0.32   | 0.58 | 0.13                       | 0.24                 | 0.076                |
| 1(3)-glyceryl-6-keto-PGF1alpha / 2-glyceryl-6-keto-PGF1α | 443.265 | 0.84     | C23H40O8  | 2.8      | 4.9E-06      | 1.4E-04         | -LGA       | -       | -     | 4.40 | 5.41       | 0.20    | 0.26   | 1.73 | -LGA       | -       | -      | 4.07 | 0.26                       | 0                    | 0.049                |
| 11-HEDE                                                  | 301.199 | 0.89     | C20H36O3  | 8.6      | 0.0051       | 0.051           | 0.35       | 0.77    | 0.95  | 0.61 | 2.99       | 0.0047  | 0.045  | 2.04 | 0.12       | 3.2E-04 | 0.0029 | 1.75 | 0.076                      | 0.0089               | 0.025                |
| 12,20-DIHETE                                             | 355.228 | 2.52     | C20H32O4  | 3.9      | 6.9E-06      | 1.4E-04         | -LGA       | -       | -     | 4.61 | 1.59       | 0.83    | 0.89   | 1.25 | -LGA       | -       | -      | 3.97 | 0.17                       | 0                    | 0.11                 |
| 12-HETE                                                  | 339.233 | 3.21     | C20H32O3  | 1.1      | 0.0017       | 0.018           | 0.01       | 0.011   | 0.063 | 2.47 | 0.87       | 0.97    | 0.99   | 1.36 | 0.01       | 5.9E-04 | 0.0043 | 2.50 | 4.6                        | 0.055                | 5.3                  |
| 15-HpETE                                                 | 335.223 | 0.96     | C20H32O4  | 3.7      | 0.15         | 0.37            | 4.70       | 0.040   | 0.12  | 1.66 | 3.04       | 0.16    | 0.22   | 1.64 | 1.55       | 0.51    | 0.52   | 0.67 | 0.16                       | 0.24                 | 0.05                 |
| 19-hydroxy-PGE2                                          | 429.25  | 0.82     | C20H34O6  | 5.4      | 2.2E-07      | 1.4E-05         | -LGA       | -       | -     | 3.41 | 22.20      | 8.7E-05 | 0.0025 | 3.45 | -LGA       | -       | -      | 3.84 | 0.061                      | 0                    | 0.0027               |
| 5S-HpEPE                                                 | 353.212 | 1.71     | C20H30O4  | 2.8      | 6.9E-06      | 1.4E-04         | -LGA       | -       | -     | 4.76 | 0.99       | 0.67    | 0.75   | 0.22 | -LGA       | -       | -      | 4.15 | 0.18                       | 0                    | 0.18                 |
| Fatty Acids and Conjugates                               |         |          |           |          |              |                 |            |         |       |      |            |         |        |      |            |         |        |      |                            |                      |                      |
| α-Linolenic acid                                         | 277.217 | 2.55     | C18H30O2  | 2.4      | 0.080        | 0.26            | 0.86       | 0.34    | 0.58  | 0.28 | 1.25       | 0.16    | 0.22   | 0.67 | 0.68       | 0.045   | 0.072  | 0.64 | 0.5                        | 0.4                  | 0.4                  |
| Docosatetraenoic acid (Adrenic Acid)                     | 331.264 | 3.65     | C22H36O2  | 1.4      | 0.013        | 0.094           | 0.91       | 0.18    | 0.37  | 0.30 | 1.18       | 0.093   | 0.19   | 0.65 | 0.76       | 0.0194* | 0.019  | 0.56 | 0.4                        | 0.3                  | 0.3                  |
| Docosahexaenoic acid (DHA)                               | 327.233 | 2.77     | C22H32O2  | 2.1      | 0.0057       | 0.054           | 0.97       | 0.83    | 0.97  | 0.14 | 1.55       | 0.0058  | 0.045  | 1.07 | 0.63       | 0.020*  | 0.020  | 0.75 | 2.2                        | 1.4                  | 1.4                  |
| Docosapentaenoic acid (DPA)                              | 329.249 | 3.16     | C22H34O2  | 5.8      | 0.030        | 0.16            | 1.03       | 0.76    | 0.95  | 0.13 | 1.56       | 0.019   | 0.077  | 0.99 | 0.66       | 0.026*  | 0.026  | 0.61 | 0.1                        | 0.1                  | 0.1                  |
| Eicosadienoic acid                                       | 307.264 | 3.84     | C20H36O2  | 2.4      | 0.053        | 0.23            | 0.91       | 0.37    | 0.61  | 0.16 | 1.18       | 0.14    | 0.23   | 0.67 | 0.77       | 0.023*  | 0.022  | 0.56 | 0.3                        | 0.3                  | 0.3                  |
| Hexacosanedioic acid                                     | 425.364 | 3.52     | C26H50O4  | 2.4      | 9.4E-05      | 0.0016          | 0.67       | 9.0E-04 | 0.037 | 0.96 | 1.36       | 0.021   | 0.10   | 0.91 | 0.49       | 0.0027* | 0.0027 | 1.07 | 0.3                        | 0.1                  | 0.2                  |
| Linoleic acid                                            | 279.233 | 3.05     | C18H32O2  | 1.5      | 0.037        | 0.19            | 0.80       | 0.37    | 0.61  | 0.32 | 1.40       | 0.081   | 0.18   | 0.87 | 0.57       | 0.022*  | 0.022  | 0.81 | 10.0                       | 5.7                  | 7.1                  |
| Myristic acid                                            | 227.202 | 2.56     | C14H28O2  | 3.2      | 0.13         | 0.36            | 0.91       | 0.45    | 0.67  | 0.16 | 1.22       | 0.21    | 0.28   | 0.68 | 0.75       | 0.054*  | 0.054  | 0.57 | 1.3                        | 1.0                  | 1.1                  |
| Oleic acid                                               | 281.249 | 3.63     | C18H34O2  | 1.1      | 0.058        | 0.23            | 0.95       | 1.00    | 1.00  | 0.05 | 1.41       | 0.070   | 0.17   | 0.94 | 0.68       | 0.016   | 0.032  | 0.59 | 0.3                        | 0.2                  | 0.2                  |
| Palmitic acid                                            | 255.233 | 3.46     | C16H32O2  | 2.4      | 0.11         | 0.30            | 0.98       | 0.85    | 0.94  | 0.10 | 1.26       | 0.074   | 0.16   | 0.74 | 0.78       | 0.045   | 0.072  | 0.48 | 22.96                      | 17.80                | 18.21                |
| Fatty acyl carnitines                                    |         |          |           |          |              |                 |            |         |       |      |            |         |        |      |            |         |        |      |                            |                      |                      |
| L-carnitine                                              | 162.112 | 0.74     | C7H15NO3  | 5.3      | 0.060        | 0.075           | 1.29       | 0.015   | 0.14  | 0.39 | 1.07       | 0.50    | 0.53   | 0.30 | 1.20       | 0.090   | 0.17   | 0.30 | 0.026                      | 0.031                | 0.024                |
| Decanoylcarnitine                                        | 316.248 | 0.92     | C17H33NO4 | 7.9      | 0.045        | 0.067           | 1.30       | 0.027   | 0.17  | 0.38 | 1.50       | 0.033   | 0.052  | 1.12 | 0.87       | 0.36    | 0.49   | 0.15 | 0.00051                    | 0.00044              | 0.00034              |
| Decenoylcarnitine                                        | 314.233 | 0.86     | C17H31NO4 | 8.6      | 0.034        | 0.061           | 1.31       | 0.039   | 0.18  | 0.38 | 1.49       | 0.025   | 0.045  | 1.12 | 0.88       | 0.58    | 0.72   | 0.09 | 0.00047                    | 0.00041              | 0.00031              |
| Octenoylcarnitine                                        | 286.201 | 0.79     | C15H27NO4 | 9.8      | 0.35         | 0.35            | 1.25       | 0.14    | 0.27  | 0.30 | 1.26       | 0.28    | 0.32   | 0.64 | 0.99       | 0.85    | 0.92   | 0.20 | 0.00032                    | 0.00032              | 0.00026              |
| Oleoylcarnitine                                          | 426.358 | 2.43     | C25H47NO4 | 5.5      | 0.0091       | 0.043           | 1.46       | 0.0035  | 0.092 | 0.65 | 1.15       | 0.22    | 0.26   | 0.49 | 1.27       | 0.038   | 0.10   | 0.40 | 0.00085                    | 0.0011               | 0.00074              |
| Palmitoylcarnitine                                       | 400.342 | 2.25     | C23H45NO4 | 5.4      | 0.0017       | 0.018           | 1.46       | 2.8E-04 | 0.029 | 0.64 | 1.18       | 0.14    | 0.16   | 0.48 | 1.24       | 0.029   | 0.083  | 0.38 | 0.00083                    | 0.0010               | 0.00070              |
| Fatty esters                                             |         |          |           |          |              |                 |            |         |       |      |            |         |        |      |            |         |        |      |                            |                      |                      |
| FAHFA(18:1-(10-O-16:0)                                   | 595.494 | 3.8      | C34H64O4  | 1.4      | 0.0014       | 0.016           | 0.71       | 0.0076  | 0.048 | 0.75 | 1.33       | 0.082   | 0.16   | 0.83 | 0.54       | 0.0014  | 0.0077 | 0.94 | 0.024                      | 0.013                | 0.018                |
| FAHFA(30:1)                                              | 539.431 | 2.95     | C30H56O4  | 2.6      | 1.1E-04      | 0.0017          | 0.65       | 0.0022  | 0.037 | 0.92 | 1.36       | 0.041   | 0.11   | 0.92 | 0.47       | 1.2E-05 | 4.E-04 | 1.10 | 0.049                      | 0.023                | 0.036                |
| Ascorbyl palmitate                                       | 473.275 | 0.85     | C22H38O7  | 4.1      | 1.8E-07      | 1.4E-05         | -          | -       | -     | -    | +SGA       | -       | -      | 5.49 | -LGA       | -       | -      | 3.80 | 0.051                      | 0                    | 0                    |
| 3-Hexenyl 3-hydroxybutanoate; WE 10:1;O                  | 245.14  | 0.78     | C10H18O3  | 8.1      | 1.8E-07      | 1.4E-05         | -          | -       | -     | -    | +SGA       | -       | -      | 4.80 | -LGA       | -       | -      | 3.39 | 0.11                       | 0                    | 0                    |
| Octadecanoids                                            |         |          |           |          |              |                 |            |         |       |      |            |         |        |      |            |         |        |      |                            |                      |                      |
| 9-HODE                                                   | 297.242 | 12.88    | C18H32O3  | 7.1      | 0.0033       | 0.021           | 3.55       | 0.045   | 0.15  | 1.56 | 1.98       | 0.0032  | 0.013  | 0.96 | 1.79       | 0.62    | 0.74   | 1.11 | 0.0091                     | 0.016                | 0.0046               |
| 9-OxoODE                                                 | 295.227 | 12.71    | C18H30O3  | 3.1      | 0.079        | 0.094           | 3.17       | 0.044   | 0.15  | 1.88 | 2.49       | 0.028   | 0.11   | 2.18 | 1.27       | 0.98    | 0.99   | 1.58 | 0.032                      | 0.041                | 0.013                |
| Oxo fatty acids                                          |         |          |           |          |              |                 |            |         |       |      |            |         |        |      |            |         |        |      |                            |                      |                      |
| FA 12:1;O                                                | 273.17  | 0.76     | C12H22O3  | 4.0      | 0.27         | 0.53            | 0.90       | 0.50    | 0.69  | 0.30 | 8.21       | 0.31    | 0.36   | 1.80 | 0.11       | 0.060   | 0.084  | 1.34 | 0.019                      | 0.0021               | 0.0023               |
| FA 26:2;O                                                | 467.374 | 2.72     | C26H48O3  | 2.3      | 5.2E-04      | 0.0069          | 0.69       | 0.0033  | 0.048 | 0.90 | 1.17       | 0.13    | 0.20   | 0.55 | 0.58       | 2.4E-04 | 0.0030 | 0.90 | 1.4                        | 0.82                 | 1.2                  |
| FA 28:2;O                                                | 495.405 | 3.78     | C28H52O3  | 4.2      | 0.0012       | 0.014           | 0.70       | 0.0070  | 0.048 | 0.82 | 1.28       | 0.093   | 0.19   | 0.80 | 0.55       | 0.0011  | 0.0071 | 0.97 | 0.31                       | 0.17                 | 0.24                 |
| methyl-FA 18:3;2OOH                                      | 415.236 | 0.81     | C19H32O6  | 5.1      | 1.3E-06      | 6.7E-05         | -LGA       | -       | -     | 3.74 | 8.42       | 0.0062  | 0.045  | 2.52 | -LGA       | -       | -      | 3.82 | 0.096                      | 0                    | 0.011                |
| 6-Hydroxypentadecanedioic acid                           | 287.187 | 0.84     | C15H28O5  | 6.1      | 5.5E-06      | 1.4E-04         | -LGA       | -       | -     | 3.93 | 4.83       | 0.28    | 0.33   | 1.73 | -LGA       | -       | -      | 3.66 | 0.061                      | 0                    | 0.013                |
| Glycerolipids                                            |         |          |           |          |              |                 |            |         |       |      |            |         |        |      |            |         |        |      |                            |                      |                      |
| Diacylglycerols                                          |         |          |           |          |              |                 |            |         |       |      |            |         |        |      |            |         |        |      |                            |                      |                      |
| DG 16:0/18:1/0:0                                         | 612.556 | 11.83    | C37H70O5  | 9.0      | 0.095        | 0.11            | 1.50       | 0.048   | 0.18  | 0.75 | 1.32       | 0.11    | 0.14   | 0.80 | 1.14       | 0.49    | 0.59   | 0.51 | 0.033                      | 0.037                | 0.025                |
| DG 16:0/18:2/0:0                                         | 610.539 | 11.34    | C37H68O5  | 6.0      | 1.5E-05      | 0.0015          | 1.45       | 0.053   | 0.20  | 0.70 | 3.55       | 1.8E-04 | 0.011  | 3.46 | 0.41       | 4.8E-04 | 0.0083 | 1.33 | 0.041                      | 0.017                | 0.012                |
| DG 18:1/18:1/0:0                                         | 638.572 | 11.87    | C39H72O5  | 5.9      | 0.064        | 0.078           | 1.27       | 0.027   | 0.17  | 0.39 | 1.15       | 0.033   | 0.052  | 0.41 | 1.11       | 0.34    | 0.47   | 0.28 | 0.079                      | 0.087                | 0.068                |
| DG 18:1/18:2/0:0                                         | 636.556 | 11.54    | C39H70O5  | 5.8      | 0.046        | 0.067           | 1.22       | 0.078   | 0.20  | 0.38 | 1.32       | 0.012   | 0.026  | 0.78 | 0.93       | 0.47    | 0.61   | 0.34 | 0.075                      | 0.070                | 0.057                |
| DG 18:2/16:0/0:0                                         | 651.52  | 11.58    | C37H68O5  | 2.6      | 0.30         | 0.57            | 1.31       | 0.27    | 0.49  | 0.75 | 1.56       | 0.047   | 0.12   | 1.06 | 0.84       | 0.46    | 0.48   | 0.57 | 0.0038                     | 0.0059               | 0.0050               |
| DG 18:0/18:2/0:0                                         | 655.507 | 11.94    | C39H72O5  | 7.9      | 0.076        | 0.26            | 1.52       | 0.026   | 0.10  | 0.91 | 1.28       | 0.077   | 0.16   | 0.82 | 1.19       | 0.31    | 0.35   | 0.52 | 0.0015                     | 0.0020               | 0.0023               |
| DG 18:3/19:0/0:0                                         | 677.537 | 11.66    | C39H70O5  | 1.6      | 0.050        | 0.23            | 1.26       | 0.22    | 0.44  | 0.65 | 1.48       | 0.0095  | 0.060  | 1.05 | 0.85       | 0.24    | 0.28   | 0.52 | 0.0065                     | 0.0055               | 0.0044               |
| Triacylglycerols                                         |         |          |           |          |              |                 |            |         |       |      |            |         |        |      |            |         |        |      |                            |                      |                      |
| TG 14:0/18:1/22:6                                        | 915.683 | 13.2     | C57H96O6  | 4.9      | 0.034        | 0.061           | 0.98       | 0.88    | 0.93  | 0.25 | 1.63       | 0.013   | 0.027  | 1.30 | 0.60       | 0.013   | 0.055  | 0.79 | 0.010                      | 0.006                | 0.006                |
| TG 14:0/22:2/18:2                                        | 921.731 | 13.94    | C57H102O6 | 4.8      | 0.024        | 0.057           | 1.20       | 0.078   | 0.20  | 0.31 | 1.29       | 0.0061  | 0.021  | 0.71 | 0.93       | 0.62    | 0.74   | 0.29 | 0.028                      | 0.026                | 0.022                |
| TG 14:0/18:3/22:3                                        | 917.7   | 13.57    | C57H98O6  | 6.7      | 0.023        | 0.057           | 0.86       | 0.18    | 0.32  | 0.27 | 1.80       | 0.061   | 0.087  | 1.46 | 0.48       | 0.016   | 0.068  | 1.00 | 0.0041                     | 0.0020               | 0.0023               |
| TG 14:0/22:4/18:2                                        | 925.725 | 13.23    | C59H98O6  | 5.5      | 0.056        | 0.073           | 0.91       | 0.36    | 0.49  | 0.34 | 1.51       | 0.042   | 0.063  | 1.09 | 0.60       | 0.022   | 0.070  | 0.80 | 0.0023                     | 0.0014               | 0.0015               |
| TG 15:0/18:3/19:0                                        | 895.715 | 13.94    | C55H100O6 | 6.0      | 0.016        | 0.049           | 1.32       | 0.056   | 0.19  | 0.48 | 1.41       | 0.0071  | 0.020  | 0.93 | 0.94       | 0.65    | 0.75   | 0.40 | 0.061                      | 0.057                | 0.043                |
| TG 15:0/20:0/O-18:0                                      | 901.802 | 13.55    | C57H98O6  | 14.7     | 0.017        | 0.049           | 1.15       | 0.21    | 0.34  | 0.27 | 1.48       | 0.0050  | 0.019  | 1.05 | 0.78       | 0.068   | 0.15   | 0.42 | 0.0073                     | 0.0057               | 0.0050               |
| TG 16:0/16:0/20:4                                        | 872.77  | 13.55    | C55H98O6  | 4.3      | 0.017        | 0.049           | 1.27       | 0.21    | 0.33  | 0.42 | 1.80       | 0.0049  | 0.019  | 1.54 | 0.70       | 0.095   | 0.19   | 0.66 | 0.080                      | 0.056                | 0.045                |
| TG 16:0/16:1/20:4                                        | 870.766 | 13.94    | C55H96O6  | 5.0      | 0.035        | 0.061           | 1.54       | 0.061   | 0.20  | 0.64 | 1.6        |         |        |      |            |         |        |      |                            |                      |                      |

|                        |         |          |            |       |           |              |            |         |       |      |            |         |        |      |            |         |        |      |                            |                   |                   |
|------------------------|---------|----------|------------|-------|-----------|--------------|------------|---------|-------|------|------------|---------|--------|------|------------|---------|--------|------|----------------------------|-------------------|-------------------|
| TG 16:0/18:1/18:1      | 876.8   | 13.56    | C55H102O6  | 8.8   | 0.030     | 0.059        | 1.08       | 0.48    | 0.56  | 0.19 | 1.40       | 0.012   | 0.026  | 0.95 | 0.77       | 0.052   | 0.12   | 0.45 | 0.028                      | 0.021             | 0.020             |
| TG 16:0/18:1/18:3      | 877.725 | 13.55    | C55H98O6   | 5.1   | 0.014     | 0.047        | 1.23       | 0.14    | 0.27  | 0.36 | 1.58       | 0.0056  | 0.019  | 1.22 | 0.78       | 0.15    | 0.26   | 0.52 | 0.0054                     | 0.0042            | 0.0034            |
|                        |         |          |            |       |           |              | LGA vs AGA |         |       |      | SGA vs AGA |         |        |      | LGA vs SGA |         |        |      | Semi-quantification in ppm |                   |                   |
| Name                   | m/z     | RT (min) | Formula    | CV QC | p kruskal | p kruskal BH | FC         | p value | pBH   | VIP  | FC         | p value | pBH    | VIP  | FC         | p value | pBH    | VIP  | ppm SGA (0.12ppm)          | ppm LGA (0.12ppm) | ppm AGA (0.12ppm) |
| TG 16:0/18:1/20:4      | 898.785 | 13.56    | C57H100O6  | 16.5  | 0.055     | 0.073        | 1.10       | 0.47    | 0.50  | 0.25 | 1.53       | 0.018   | 0.035  | 1.21 | 0.72       | 0.052   | 0.12   | 0.56 | 0.035                      | 0.025             | 0.023             |
| TG 16:0/18:1/22:6      | 922.788 | 13.56    | C59H100O6  | 7.3   | 0.021     | 0.055        | 1.02       | 0.87    | 0.93  | 0.19 | 1.69       | 0.0071  | 0.020  | 1.38 | 0.60       | 0.0091  | 0.055  | 0.78 | 0.044                      | 0.026             | 0.026             |
| TG 16:0/18:2/20:4      | 896.77  | 13.24    | C57H98O6   | 7.5   | 0.027     | 0.058        | 1.01       | 0.93    | 0.95  | 0.08 | 1.42       | 0.026   | 0.045  | 0.99 | 0.71       | 0.0096  | 0.055  | 0.51 | 0.019                      | 0.014             | 0.013             |
| TG 16:0/18:2/22:6      | 920.769 | 13.23    | C59H98O6   | 2.6   | 0.025     | 0.057        | 0.91       | 0.43    | 0.53  | 0.40 | 1.88       | 0.020   | 0.037  | 1.59 | 0.48       | 0.013   | 0.055  | 1.08 | 0.030                      | 0.014             | 0.016             |
| TG 16:0/18:3/22:5      | 941.7   | 13.23    | C59H98O6   | 6.7   | 0.037     | 0.061        | 0.84       | 0.34    | 0.47  | 0.69 | 2.15       | 0.033   | 0.052  | 1.83 | 0.39       | 0.019   | 0.067  | 1.42 | 0.011                      | 0.004             | 0.005             |
| TG 16:0/20:1/0-18:0    | 913.796 | 13.55    | C57H110O5  | 22.9  | 0.037     | 0.061        | 1.27       | 0.14    | 0.27  | 0.39 | 1.64       | 0.012   | 0.026  | 1.30 | 0.77       | 0.18    | 0.29   | 0.60 | 0.036                      | 0.028             | 0.022             |
| TG 16:0/20:4/22:6      | 944.771 | 13.23    | C61H98O6   | 21.1  | 0.056     | 0.073        | 0.90       | 0.57    | 0.49  | 0.58 | 2.25       | 0.049   | 0.074  | 1.97 | 0.40       | 0.022   | 0.070  | 1.34 | 0.0088                     | 0.0035            | 0.0039            |
| TG 16:1/18:1/18:1      | 874.786 | 13.94    | C55H100O6  | 2.8   | 0.024     | 0.057        | 1.41       | 0.081   | 0.20  | 0.57 | 1.52       | 0.011   | 0.024  | 1.12 | 0.93       | 0.57    | 0.72   | 0.49 | 0.18                       | 0.17              | 0.12              |
| TG 16:1/18:1/18:2      | 872.764 | 13.54    | C55H98O6   | 6.9   | 0.0098    | 0.044        | 1.33       | 0.035   | 0.20  | 0.38 | 1.53       | 0.0045  | 0.020  | 1.03 | 0.87       | 0.16    | 0.26   | 0.46 | 0.019                      | 0.016             | 0.012             |
| TG 16:1/18:1/20:2      | 905.757 | 13.94    | C57H102O6  | 7.0   | 0.014     | 0.047        | 1.35       | 0.030   | 0.15  | 0.46 | 1.42       | 0.0061  | 0.021  | 1.02 | 0.95       | 0.71    | 0.79   | 0.36 | 0.0041                     | 0.0039            | 0.0029            |
| TG 16:1/18:2/20:3      | 896.77  | 13.56    | C57H98O6   | 15.7  | 0.014     | 0.047        | 1.16       | 0.22    | 0.36  | 0.28 | 1.60       | 0.0058  | 0.019  | 1.24 | 0.73       | 0.051   | 0.12   | 0.59 | 0.051                      | 0.037             | 0.032             |
| TG 16:0/20:5/22:6      | 942.753 | 12.81    | C61H96O6   | 11.2  | 0.21      | 0.22         | 1.21       | 0.44    | 0.53  | 0.63 | 2.58       | 0.040   | 0.062  | 2.51 | 0.47       | 0.13    | 0.24   | 1.06 | 0.0014                     | 0.0006            | 0.0005            |
| TG 18:1/18:1/18:4      | 917.699 | 13.4     | C57H98O6   | 7.4   | 0.042     | 0.063        | 0.85       | 0.10    | 0.24  | 0.33 | 1.26       | 0.12    | 0.14   | 0.70 | 0.67       | 0.021   | 0.069  | 0.64 | 0.017                      | 0.012             | 0.014             |
| TG 18:0/18:3/18:4      | 915.683 | 13.19    | C57H96O6   | 5.1   | 0.051     | 0.069        | 0.95       | 0.62    | 0.70  | 0.31 | 1.53       | 0.037   | 0.056  | 1.12 | 0.62       | 0.027   | 0.081  | 0.79 | 0.010                      | 0.006             | 0.006             |
| TG 18:0/18:3/20:4      | 922.777 | 13.35    | C59H100O6  | 30.2  | 0.091     | 0.10         | 1.46       | 0.16    | 0.29  | 0.69 | 2.03       | 0.030   | 0.050  | 2.07 | 0.72       | 0.26    | 0.38   | 0.64 | 0.0049                     | 0.0035            | 0.0024            |
| TG 18:1/18:1/18:2      | 900.797 | 13.56    | C57H102O6  | 13.8  | 0.011     | 0.044        | 1.09       | 0.41    | 0.53  | 0.19 | 1.61       | 0.0013  | 0.013  | 1.30 | 0.68       | 0.0082  | 0.055  | 0.60 | 0.022                      | 0.015             | 0.014             |
| TG 18:1/18:2/18:1      | 900.801 | 13.94    | C57H102O6  | 7.9   | 0.040     | 0.063        | 1.20       | 0.12    | 0.25  | 0.32 | 1.37       | 0.010   | 0.024  | 0.88 | 0.88       | 0.29    | 0.43   | 0.37 | 0.075                      | 0.066             | 0.055             |
| TG 18:1/18:2/18:4      | 894.754 | 13.24    | C57H96O6   | 5.5   | 0.035     | 0.061        | 1.04       | 0.62    | 0.70  | 0.12 | 1.45       | 0.0057  | 0.019  | 1.03 | 0.72       | 0.013   | 0.055  | 0.52 | 0.021                      | 0.015             | 0.014             |
| TG 18:1/18:3/18:3      | 894.752 | 13.37    | C57H96O6   | 4.2   | 0.046     | 0.067        | 0.94       | 0.42    | 0.53  | 0.17 | 1.28       | 0.036   | 0.055  | 0.71 | 0.73       | 0.013   | 0.055  | 0.52 | 0.036                      | 0.027             | 0.028             |
| TG 18:1/18:2/22:0      | 958.878 | 13.94    | C61H112O6  | 12.7  | 0.0064    | 0.035        | 1.32       | 0.013   | 0.14  | 0.44 | 1.38       | 0.0038  | 0.019  | 0.87 | 0.95       | 0.67    | 0.76   | 0.31 | 0.0017                     | 0.0016            | 0.0012            |
| TG 20:4/16:0/0-18:0    | 907.752 | 12.44    | C57H104O5  | 4.6   | 0.0011    | 0.014        | 2.88       | 0.0017  | 0.057 | 1.45 | 2.50       | 0.0017  | 0.014  | 2.47 | 1.15       | 0.89    | 0.94   | 0.90 | 0.0020                     | 0.0022            | 0.0008            |
| TG 80:5                | 1311.17 | 14.11    | C83H156NO9 | 10.8  | 0.031     | 0.060        | 0.86       | 0.16    | 0.29  | 0.96 | 0.49       | 0.0014  | 0.014  | 2.27 | 1.76       | 0.41    | 0.55   | 0.63 | 0.00024                    | 0.00042           | 0.00049           |
| TG 84:5                | 1367.23 | 14.69    | C87H164NO9 | 7.7   | 0.022     | 0.056        | 0.73       | 0.085   | 0.22  | 0.80 | 0.63       | 0.0031  | 0.018  | 1.23 | 1.15       | 0.46    | 0.57   | 0.31 | 0.00040                    | 0.00047           | 0.00064           |
| Glycerophospholipids   |         |          |            |       |           |              |            |         |       |      |            |         |        |      |            |         |        |      |                            |                   |                   |
| Glycerophosphocholines |         |          |            |       |           |              |            |         |       |      |            |         |        |      |            |         |        |      |                            |                   |                   |
| PC O-16:1/22:6         | 790.575 | 7.77     | C46H80NO7P | 6.7   | 0.036     | 0.061        | 0.64       | 0.0069  | 0.14  | 0.88 | 0.95       | 0.46    | 0.50   | 0.41 | 0.67       | 0.034   | 0.096  | 0.74 | 0.0070                     | 0.0047            | 0.0073            |
| PC O-18:1/18:2         | 770.605 | 9.31     | C44H84NO7P | 16.1  | 0.027     | 0.058        | 0.82       | 0.089   | 0.21  | 0.43 | 0.70       | 0.0055  | 0.019  | 0.96 | 1.18       | 0.71    | 0.80   | 0.19 | 0.0055                     | 0.0065            | 0.0079            |
| PC O-22:1/22:3         | 880.715 | 12.13    | C52H98NO7P | 28.1  | 0.031     | 0.060        | 1.36       | 0.14    | 0.27  | 0.57 | 1.68       | 0.012   | 0.026  | 1.79 | 0.81       | 0.23    | 0.35   | 0.42 | 0.028                      | 0.023             | 0.017             |
| PC O-18:1/0:0          | 508.376 | 3.05     | C26H54NO6P | 5.0   | 0.030     | 0.059        | 1.45       | 0.030   | 0.15  | 0.60 | 0.99       | 0.61    | 0.63   | 0.43 | 1.47       | 0.026   | 0.083  | 0.63 | 0.0027                     | 0.0040            | 0.0027            |
| LPC 0:0/16:0           | 496.34  | 2.28     | C24H50NO7P | 4.9   | 0.041     | 0.063        | 1.23       | 0.13    | 0.26  | 0.31 | 0.91       | 0.23    | 0.26   | 0.42 | 1.35       | 0.019   | 0.070  | 0.46 | 0.023                      | 0.031             | 0.026             |
| LPC 0:0/18:0           | 524.371 | 3.13     | C26H54NO7P | 9.6   | 0.058     | 0.073        | 1.36       | 0.019   | 0.15  | 0.45 | 1.17       | 0.34    | 0.37   | 0.43 | 1.16       | 0.19    | 0.32   | 0.37 | 0.0094                     | 0.0109            | 0.0080            |
| LPC 14:0/0:0           | 468.308 | 1.68     | C22H46NO7P | 5.6   | 0.0046    | 0.028        | 1.07       | 0.43    | 0.53  | 0.13 | 0.76       | 0.0019  | 0.014  | 0.90 | 1.41       | 0.0021  | 0.025  | 0.53 | 0.014                      | 0.020             | 0.019             |
| LPC 16:1/0:0           | 494.324 | 1.84     | C24H48NO7P | 5.7   | 0.0025    | 0.019        | 1.12       | 0.27    | 0.39  | 0.23 | 0.68       | 0.0014  | 0.013  | 1.35 | 1.65       | 7.0E-04 | 0.010  | 0.81 | 0.045                      | 0.074             | 0.066             |
| LPC 18:0/0:0           | 524.371 | 3.32     | C26H54NO7P | 4.1   | 0.40      | 0.40         | 1.39       | 0.24    | 0.35  | 0.50 | 1.16       | 0.43    | 0.47   | 0.43 | 1.20       | 0.67    | 0.77   | 0.40 | 0.37                       | 0.45              | 0.32              |
| LPC 18:1/0:0           | 580.362 | 2.7      | C26H52NO7P | 2.9   | 0.0050    | 0.051        | 1.11       | 0.11    | 0.24  | 0.37 | 0.86       | 0.031   | 0.11   | 0.70 | 1.29       | 0.0020  | 0.011  | 0.59 | 0.33                       | 0.43              | 0.38              |
| LPC 18:2/0:0           | 520.339 | 2.1      | C26H50NO7P | 3.5   | 0.39      | 0.39         | 1.10       | 0.56    | 0.65  | 0.33 | 0.87       | 0.33    | 0.36   | 0.66 | 1.27       | 0.21    | 0.32   | 0.47 | 0.19                       | 0.23              | 0.21              |
| LPC 20:3/0:0           | 546.355 | 2.57     | C28H52NO7P | 6.2   | 2.2E-04   | 0.0045       | 1.21       | 0.11    | 0.24  | 0.31 | 0.59       | 0.0029  | 0.018  | 1.65 | 2.04       | 2.5E-04 | 0.0064 | 1.07 | 0.0079                     | 0.0160            | 0.0132            |
| PC 14:1/20:2           | 756.553 | 6.79     | C42H78NO8P | 3.8   | 0.049     | 0.067        | 1.03       | 0.84    | 0.91  | 0.23 | 0.73       | 0.017   | 0.032  | 1.01 | 1.42       | 0.049   | 0.12   | 0.47 | 0.010                      | 0.015             | 0.014             |
| PC 16:0/18:1           | 818.591 | 9.24     | C42H82NO8P | 3.1   | 0.0090    | 0.072        | 1.02       | 0.81    | 0.92  | 0.24 | 0.80       | 0.0092  | 0.052  | 0.81 | 1.27       | 0.010   | 0.025  | 0.48 | 0.15                       | 0.19              | 0.18              |
| PC 16:0/20:3           | 842.591 | 8.35     | C44H82NO8P | 5.1   | 0.15      | 0.38         | 0.91       | 0.40    | 0.64  | 0.46 | 0.77       | 0.020   | 0.077  | 0.86 | 1.19       | 0.17    | 0.22   | 0.32 | 0.058                      | 0.069             | 0.076             |
| PC 16:0/22:4           | 810.601 | 8.28     | C46H84NO8P | 2.9   | 0.062     | 0.076        | 1.10       | 0.52    | 0.61  | 0.28 | 0.77       | 0.026   | 0.045  | 0.77 | 1.43       | 0.078   | 0.16   | 0.46 | 0.030                      | 0.043             | 0.039             |
| PC 16:0/16:1           | 732.553 | 7.14     | C40H78NO8P | 1.6   | 0.010     | 0.044        | 1.06       | 0.67    | 0.74  | 0.22 | 0.73       | 0.0099  | 0.025  | 1.13 | 1.45       | 0.020   | 0.070  | 0.56 | 0.10                       | 0.15              | 0.14              |
| PC 16:0/18:1           | 760.585 | 8.86     | C42H82NO8P | 1.0   | 0.0069    | 0.035        | 1.09       | 0.68    | 0.76  | 0.21 | 0.80       | 0.0043  | 0.020  | 0.79 | 1.37       | 0.012   | 0.062  | 0.44 | 1.01                       | 1.38              | 1.27              |
| PC 16:0/20:3           | 784.585 | 8.55     | C44H82NO8P | 1.9   | 1.7E-04   | 0.0045       | 1.15       | 0.26    | 0.37  | 0.29 | 0.44       | 0.0011  | 0.013  | 2.46 | 2.64       | 2.5E-04 | 0.0064 | 1.38 | 0.029                      | 0.077             | 0.067             |
| PC 16:0/22:4           | 810.601 | 8.66     | C46H84NO8P | 2.8   | 0.0019    | 0.018        | 0.85       | 0.069   | 0.20  | 0.30 | 0.71       | 2.5E-04 | 0.011  | 1.02 | 1.20       | 0.039   | 0.10   | 0.25 | 0.046                      | 0.055             | 0.065             |
| PC 18:0/20:3           | 870.622 | 11.29    | C46H86NO8P | 2.8   | 1.0E-04   | 0.0016       | 1.03       | 0.92    | 1.00  | 0.20 | 0.42       | 2.2E-05 | 0.0012 | 1.73 | 2.44       | 1.2E-04 | 0.0016 | 1.19 | 0.004                      | 0.0108            | 0.011             |
| PC 18:0/18:1           | 788.616 | 11.23    | C44H86NO8P | 1.9   | 0.026     | 0.058        | 0.99       | 0.90    | 0.94  | 0.19 | 0.80       | 0.0061  | 0.021  | 0.67 | 1.23       | 0.10    | 0.19   | 0.28 | 0.16                       | 0.20              | 0.20              |
| PC 18:0/20:5           | 808.585 | 8.06     | C46H82NO8P | 2.0   | 3.0E-04   | 0.0051       | 0.81       | 0.13    | 0.26  | 0.33 | 0.54       | 7.1E-04 | 0.013  | 1.81 | 1.49       | 4.0E-04 | 0.0083 | 0.57 | 0.049                      | 0.073             | 0.090             |
| PC 18:1/18:2           | 784.585 | 8.04     | C44H82NO8P | 1.9   | 0.039     | 0.061        | 0.91       | 0.54    | 0.64  | 0.32 | 0.70       | 0.0057  | 0.021  | 0.99 | 1.30       | 0.15    | 0.26   | 0.32 | 0.38                       | 0.49              | 0.54              |
| PC 18:2/22:2           | 838.631 | 11.06    | C48H88NO8P | 5.7   | 0.0013    | 0.015        | 0.74       | 7.8E-04 | 0.040 | 0.47 | 0.79       | 0.0032  | 0.018  | 0.74 | 0.95       | 0.45    | 0.57   | 0.12 | 0.018                      | 0.017             | 0.023             |
| PC 22:2/16:1           | 812.616 | 10.96    | C46H86NO8P | 4.2   | 1.5E-04   | 0.0045       | 1.15       | 0.34    | 0.45  | 0.27 | 0.47       | 1.8E-04 | 0.0033 | 2.18 | 2.45       | 2.0E-04 | 0.0064 | 1.25 | 0.016                      | 0.040             | 0.034             |

|                                                                        |         |          |              |       |           |              |            |         |       |      |            |         |       |      |            |         |        |      |                            |                   |                   |
|------------------------------------------------------------------------|---------|----------|--------------|-------|-----------|--------------|------------|---------|-------|------|------------|---------|-------|------|------------|---------|--------|------|----------------------------|-------------------|-------------------|
| <i>Glycerophosphoglycerols</i>                                         |         |          |              |       |           |              |            |         |       |      |            |         |       |      |            |         |        |      |                            |                   |                   |
| PG O-18:0/18:0                                                         | 763.588 | 11.83    | C42H85O9P    | 3.5   | 0.20      | 0.45         | 1.41       | 0.22    | 0.44  | 1.12 | 1.90       | 0.035   | 0.11  | 1.45 | 0.74       | 0.37    | 0.41   | 0.46 | 0.0167                     | 0.012             | 0.009             |
|                                                                        |         |          |              |       |           |              | LGA vs AGA |         |       |      | SGA vs AGA |         |       |      | LGA vs SGA |         |        |      | Semi-quantification in ppm |                   |                   |
| Name                                                                   | m/z     | RT (min) | Formula      | CV QC | p kruskal | p kruskal BH | FC         | p value | pBH   | VIP  | FC         | p value | pBH   | VIP  | FC         | p value | pBH    | VIP  | ppm SGA (0.12ppm)          | ppm LGA (0.12ppm) | ppm AGA (0.12ppm) |
| Organooxygen compounds                                                 |         |          |              |       |           |              |            |         |       |      |            |         |       |      |            |         |        |      |                            |                   |                   |
| Carbohydrates and carbohydrate conjugates                              |         |          |              |       |           |              |            |         |       |      |            |         |       |      |            |         |        |      |                            |                   |                   |
| 2-O-[alpha-D-Glucopyranosyl-(1->6)-alpha-D-glucopyranosyl]-D-glycerate | 449.131 | 0.68     | C15H26O14    | 2.1   | 0.056     | 0.23         | 1.01       | 0.72    | 0.94  | 0.14 | 0.75       | 0.038   | 0.11  | 0.71 | 1.35       | 0.053   | 0.084  | 0.50 | 0.36                       | 0.48              | 0.48              |
| 4-O-Methyl-a-D-glucosyl-(1->2)-b-D-xylosyl-(1->4)-D-xylose             | 491.142 | 0.67     | C17H28O15    | 2.9   | 0.0081    | 0.066        | 1.59       | 0.0073  | 0.043 | 0.92 | 1.00       | 1.00    | 1.00  | 0.31 | 1.59       | 0.0031  | 0.016  | 0.71 | 0.35                       | 0.56              | 0.35              |
| a-L-Fucopyranosyl-(1->2)-b-D-galactopyranosyl-(1->2)-D-xylose          | 477.162 | 0.67     | C17H30O14    | 2.0   | 0.0073    | 0.063        | 2.24       | 0.0015  | 0.037 | 1.25 | 1.48       | 0.037   | 0.11  | 0.93 | 1.51       | 0.078   | 0.10   | 0.66 | 0.38                       | 0.57              | 0.25              |
| Prenol lipids                                                          |         |          |              |       |           |              |            |         |       |      |            |         |       |      |            |         |        |      |                            |                   |                   |
| Quinone and hydroquinone lipids                                        |         |          |              |       |           |              |            |         |       |      |            |         |       |      |            |         |        |      |                            |                   |                   |
| Vitamin K1 epoxide                                                     | 501.311 | 0.92     | C31H46O3     | 3.9   | 0.033     | 0.17         | 0.44       | 0.58    | 0.84  | 0.56 | 18.56      | 0.11    | 0.19  | 2.24 | 0.02       | 0.010   | 0.025  | 1.89 | 0.0056                     | 0.00013           | 0.00030           |
| Purines and purine derivatives                                         |         |          |              |       |           |              |            |         |       |      |            |         |       |      |            |         |        |      |                            |                   |                   |
| Caffeine                                                               | 195.088 | 0.78     | C8H10N4O2    | 8.6   | 0.083     | 0.098        | 0.43       | 0.077   | 0.20  | 1.42 | 0.37       | 0.018   | 0.035 | 4.49 | 1.15       | 0.22    | 0.34   | 1.41 | 0.00016                    | 0.00018           | 0.00043           |
| Sphingolipids                                                          |         |          |              |       |           |              |            |         |       |      |            |         |       |      |            |         |        |      |                            |                   |                   |
| Phosphosphingolipids                                                   |         |          |              |       |           |              |            |         |       |      |            |         |       |      |            |         |        |      |                            |                   |                   |
| SM 18:1;O2/21:0                                                        | 811.604 | 8.66     | C44H89N2O6P  | 3.0   | 0.0026    | 0.019        | 0.87       | 0.11    | 0.24  | 0.27 | 0.73       | 3.0E-04 | 0.011 | 0.95 | 1.20       | 0.042   | 0.11   | 0.25 | 0.019                      | 0.023             | 0.026             |
| SM 16:0;O2/22:0                                                        | 761.653 | 11.51    | C43H89N2O6P  | 4.8   | 0.026     | 0.058        | 1.15       | 0.060   | 0.19  | 0.19 | 0.93       | 0.13    | 0.16  | 0.27 | 1.24       | 0.0099  | 0.055  | 0.30 | 0.014                      | 0.017             | 0.015             |
| SM 18:1;O2/20:0                                                        | 819.659 | 11.64    | C43H89N2O6P  | 5.3   | 0.018     | 0.11         | 1.11       | 0.21    | 0.42  | 0.37 | 0.85       | 0.016   | 0.084 | 0.69 | 1.31       | 0.0059  | 0.020  | 0.60 | 0.0020                     | 0.0026            | 0.0023            |
| SM 18:0;O2/22:0                                                        | 789.686 | 11.94    | C45H93N2O6P  | 6.2   | 0.0033    | 0.021        | 1.07       | 0.26    | 0.37  | 0.11 | 0.84       | 0.011   | 0.026 | 0.52 | 1.27       | 0.0029  | 0.028  | 0.36 | 0.013                      | 0.017             | 0.016             |
| SM 18:1;O2/22:0                                                        | 787.668 | 11.54    | C45H91N2O6P  | 7.0   | 0.0070    | 0.035        | 1.36       | 0.018   | 0.14  | 0.43 | 0.92       | 0.29    | 0.32  | 0.31 | 1.47       | 0.0049  | 0.046  | 0.52 | 0.0068                     | 0.0100            | 0.0074            |
| SM 18:1;O2/24:0                                                        | 815.7   | 11.93    | C47H95N2O6P  | 2.2   | 0.014     | 0.047        | 1.24       | 0.015   | 0.14  | 0.31 | 0.97       | 0.61    | 0.64  | 0.19 | 1.28       | 0.0070  | 0.055  | 0.35 | 0.049                      | 0.063             | 0.050             |
| SM 18:0;O2/26:0                                                        | 845.741 | 13.17    | C49H101N2O6P | 12.0  | 0.037     | 0.061        | 1.40       | 0.098   | 0.22  | 0.49 | 1.54       | 0.0082  | 0.020 | 1.29 | 0.90       | 0.31    | 0.44   | 0.47 | 0.020                      | 0.018             | 0.013             |
| Ceramides                                                              |         |          |              |       |           |              |            |         |       |      |            |         |       |      |            |         |        |      |                            |                   |                   |
| Cer 18:0;O3/26:0;O                                                     | 692.656 | 12.56    | C44H89NO5    | 4.6   | 0.046     | 0.22         | 0.81       | 0.090   | 0.21  | 0.72 | 1.11       | 0.21    | 0.28  | 0.45 | 0.73       | 0.010   | 0.024  | 0.63 | 0.00018                    | 0.00013           | 0.00016           |
| Sterol lipids                                                          |         |          |              |       |           |              |            |         |       |      |            |         |       |      |            |         |        |      |                            |                   |                   |
| Bile acids and derivatives                                             |         |          |              |       |           |              |            |         |       |      |            |         |       |      |            |         |        |      |                            |                   |                   |
| ST 24:3;O4                                                             | 447.275 | 0.96     | C24H36O4     | 8.1   | 0.16      | 0.40         | 0.64       | 0.050   | 0.14  | 0.73 | 0.72       | 0.12    | 0.20  | 0.74 | 0.89       | 0.53    | 0.54   | 0.24 | 0.0019                     | 0.0017            | 0.0027            |
| Neurosteroid                                                           |         |          |              |       |           |              |            |         |       |      |            |         |       |      |            |         |        |      |                            |                   |                   |
| Pregnanolone sulfate                                                   | 397.205 | 0.79     | C21H34O5S    | 4.0   | 0.026     | 0.15         | 1.46       | 0.0051  | 0.048 | 0.62 | 1.20       | 0.15    | 0.23  | 0.55 | 1.21       | 0.16    | 0.20   | 0.30 | 0.0042                     | 0.0050            | 0.0035            |
| Steroid conjugates                                                     |         |          |              |       |           |              |            |         |       |      |            |         |       |      |            |         |        |      |                            |                   |                   |
| Estriol 3-sulfate 16-glucuronide                                       | 543.155 | 0.66     | C24H32O12S   | 5.3   | 0.049     | 0.23         | 2.01       | 0.051   | 0.14  | 0.98 | 1.08       | 0.68    | 0.73  | 0.54 | 1.86       | 0.060   | 0.084  | 0.65 | 0.0020                     | 0.0038            | 0.0019            |
| eurysterol B sulfonic acid                                             | 493.263 | 0.9      | C27H44O7S    | 3.4   | 0.12      | 0.33         | 1.35       | 0.036   | 0.11  | 0.58 | 1.03       | 0.83    | 0.87  | 0.42 | 1.30       | 0.076   | 0.11   | 0.52 | 0.0020                     | 0.0038            | 0.0019            |
| 17-beta-estradiol 3-sulfate-17-(beta-D-glucuronide)                    | 509.153 | 0.67     | C24H32O11S   | 8.3   | 0.021     | 0.13         | 1.90       | 0.0070  | 0.043 | 1.13 | 0.97       | 0.85    | 0.88  | 0.29 | 1.95       | 0.0053  | 0.020  | 0.83 | 0.0046                     | 0.0060            | 0.0045            |
| Sterols                                                                |         |          |              |       |           |              |            |         |       |      |            |         |       |      |            |         |        |      |                            |                   |                   |
| 32-oxolanosterol                                                       | 499.379 | 6.06     | C30H48O2     | 3.9   | 0.053     | 0.23         | 3.74       | 0.093   | 0.24  | 1.40 | 2.76       | 0.016   | 0.073 | 1.85 | 1.35       | 0.75    | 0.75   | 0.36 | 0.15                       | 0.20              | 0.054             |
| 22:0-Glc-Cholesterol                                                   | 871.742 | 13.25    | C55H98O7     | 2.4   | 0.030     | 0.059        | 1.10       | 0.67    | 0.75  | 0.21 | 1.45       | 0.0077  | 0.020 | 1.03 | 0.76       | 0.078   | 0.16   | 0.49 | 0.0092                     | 0.007             | 0.0063            |
| 22:2-Glc-Sitosterol                                                    | 912.765 | 13.19    | C57H98O7     | 4.1   | 0.035     | 0.061        | 0.99       | 0.95    | 0.98  | 0.18 | 1.49       | 0.015   | 0.031 | 1.08 | 0.67       | 0.016   | 0.064  | 0.66 | 0.0219                     | 0.0146            | 0.0147            |
| CE 16:1                                                                | 640.602 | 14.57    | C43H74O2     | 3.6   | 0.020     | 0.054        | 0.93       | 0.68    | 0.75  | 0.42 | 0.61       | 0.0014  | 0.014 | 1.76 | 1.53       | 0.079   | 0.16   | 0.60 | 0.0054                     | 0.0082            | 0.0088            |
| CE 18:0                                                                | 1306.24 | 16.27    | C45H80O2     | 5.4   | 0.27      | 0.28         | 0.73       | 0.14    | 0.27  | 0.93 | 0.71       | 0.050   | 0.082 | 0.86 | 1.03       | 0.90    | 0.92   | 0.43 | 0.0055                     | 0.0057            | 0.0078            |
| CE 18:3                                                                | 664.602 | 14.11    | C45H74O2     | 22.0  | 0.013     | 0.047        | 0.89       | 0.18    | 0.32  | 0.57 | 0.61       | 7.9E-04 | 0.013 | 1.61 | 1.46       | 0.40    | 0.55   | 0.53 | 0.0012                     | 0.0017            | 0.0020            |
| CE 20:3                                                                | 713.563 | 14.69    | C47H78O2     | 2.9   | 0.0066    | 0.035        | 0.89       | 0.19    | 0.33  | 0.24 | 0.77       | 9.1E-04 | 0.013 | 0.73 | 1.16       | 0.079   | 0.16   | 0.22 | 0.0061                     | 0.0070            | 0.0079            |
| DiMe(9,3) Cholesterol ester                                            | 663.571 | 12.71    | C45H74O3     | 11.1  | 0.048     | 0.067        | 2.87       | 0.042   | 0.15  | 1.82 | 2.16       | 0.049   | 0.093 | 2.05 | 1.33       | 0.93    | 0.96   | 1.59 | 0.0328                     | 0.0435            | 0.0152            |
| Cholesteryl 11-hydroperoxy-eicosatetraenoate                           | 743.538 | 12.41    | C47H76O4     | 3.2   | 1.0E-04   | 0.0045       | 0.52       | 0.049   | 0.18  | 1.95 | 2.46       | 0.038   | 0.026 | 2.72 | 0.21       | 3.7E-05 | 0.0038 | 1.97 | 0.27                       | 0.057             | 0.11              |
| Cholesteryl-6-O-myristoyl-alpha-D-glucoside                            | 739.589 | 12.57    | C47H82O7     | 3.0   | 0.012     | 0.092        | 1.32       | 0.97    | 1.00  | 1.53 | 3.37       | 0.0033  | 0.045 | 1.69 | 0.39       | 0.035   | 0.064  | 1.36 | 0.0037                     | 0.0015            | 0.0011            |
| Sitostanyl-18:0                                                        | 721.625 | 12.71    | C47H86O2     | 21.4  | 0.099     | 0.11         | 3.82       | 0.034   | 0.20  | 1.96 | 2.87       | 0.031   | 0.11  | 2.21 | 1.33       | 0.98    | 0.99   | 1.77 | 0.16                       | 0.21              | 0.055             |
| ST 29:2;O3                                                             | 445.368 | 7.76     | C29H48O3     | 19.1  | 0.23      | 0.25         | 0.73       | 0.34    | 0.33  | 2.07 | 1.11       | 0.67    | 0.69  | 0.50 | 0.66       | 0.13    | 0.23   | 1.86 | 0.0046                     | 0.0031            | 0.0042            |
| (±)9-HODE cholesteryl ester                                            | 647.575 | 12.47    | C45H76O3     | 10.1  | 0.14      | 0.15         | 1.15       | 0.24    | 0.35  | 0.62 | 1.63       | 0.048   | 0.073 | 1.64 | 0.70       | 0.13    | 0.22   | 0.85 | 0.0035                     | 0.0024            | 0.0021            |
| Secosteroids                                                           |         |          |              |       |           |              |            |         |       |      |            |         |       |      |            |         |        |      |                            |                   |                   |
| 1alpha,25-dihydroxy-16,17,23,23,24,24-hexadehydrovitamin D3            | 445.255 | 3.63     | C27H38O3     | 5.6   | 0.053     | 0.23         | 0.91       | 0.81    | 0.97  | 0.08 | 1.32       | 0.11    | 0.19  | 0.85 | 0.69       | 0.011   | 0.025  | 0.59 | 0.10                       | 0.070             | 0.077             |
| 3-Deoxyvitamin D3                                                      | 369.351 | 12.52    | C27H44       | 4.9   | 0.047     | 0.067        | 1.16       | 0.49    | 0.59  | 1.58 | 1.88       | 0.011   | 0.030 | 2.02 | 0.62       | 0.048   | 0.12   | 1.71 | 0.38                       | 0.24              | 0.20              |

CV, coefficient of variation of lipids in QC samples; p Kruskal, global p value obtained by Kruskal-Wallis test; p Kruskal BH, global p value obtained by Benjamini-Hochberg correction test; p value: obtained by Mann-Whitney U tests. pBH, Benjamini-Hochberg correction test p value; FC, fold change in the specified comparison; VIP, Variable importance in projection values higher than 1 were considered as significant.
